# Supplementary material for: Spatiotemporal Localisation of Heparan Sulphate Proteoglycans throughout Mouse Lens Morphogenesis
Source: MDPI journal article supplement (doi:10.3390/cells12101364), 2023-05-11
Supplement: s1 [file s1]

**Table S1.** Primary antibodies used for GAG and core protein immunolocalisation.

|                          | Target                       | Antibody                                                              |
|--------------------------|------------------------------|-----------------------------------------------------------------------|
| <b>Sulfation Enzyme</b>  | PAPSS2                       | pAb, Rb IgG<br>Abcam, Cat#: ab155588                                  |
| <b>Sulfated GAGs</b>     | Heparan sulfate (HS-GAG)     | mAb (F58-10E4) Ms IgMκ<br>Amsbio, Cat#: 370255-1                      |
|                          | Chondroitin Sulfate (CS-GAG) | mAb (CS-56), Ms IgM<br>Sigma, Cat#: C8035                             |
| <b>HSPG Core Protein</b> | Syndecan-1 (CD138)           | pAb, Ms IgG1κ<br>Santa Cruz Biotechnology, Cat#: sc-12765             |
|                          | Syndecan-2                   | mAb (F-5), Ms IgG1κ<br>Santa Cruz Biotechnology, Cat#: sc-376160      |
|                          | Syndecan-3                   | mAb (G-2), Ms IgMκ<br>Santa Cruz Biotechnology, Cat#: sc-398194       |
|                          | Syndecan-4                   | pAb, Rb IgG<br>Abcam, Cat#: ab24511                                   |
|                          | Glypican-1                   | mAb (A-10), Ms IgG1κ<br>Santa Cruz Biotechnology, Cat#: sc-365000     |
|                          | Glypican-2                   | mAb (F-5), Ms IgG1λ<br>Santa Cruz Biotechnology, Cat#: sc-393824      |
|                          | Glypican-3                   | mAb (F-3), Ms IgM<br>Santa Cruz Biotechnology, Cat#: sc-390587        |
|                          | Glypican-4                   | pAb, Rb IgG<br>Invitrogen, Cat#: PA5-88766                            |
|                          | Glypican-5                   | mAb (F-3), Ms IgG1κ<br>Santa Cruz Biotechnology, Cat#: sc-390838      |
|                          | Glypican-6                   | pAb, Rb IgG<br>Biorbyt, Cat#: orb539585                               |
|                          | Perlecan                     | pAb, Rb IgG<br>Gift from Prof. Dziadek, University of NSW, Australia. |
|                          | Collagen XVIII / endostatin  | Ms IgG2b (1837-46)<br>Santa Cruz Biotechnology, Cat#: sc-32720        |
|                          | Agrin                        | Ms IgMκ (D2)<br>Santa Cruz Biotechnology, Cat#: sc-374117             |

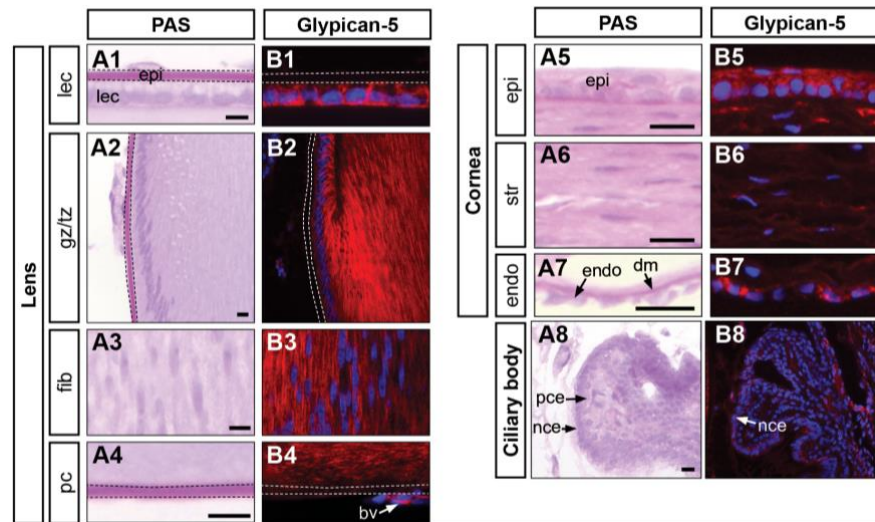

**Supplementary Figure S1.** Distribution of glypican-5 core protein in the 10-day-old rat eye. Mid-sagittal 10-day-old rat eye sections stained with Periodic acid-Schiffs (PAS, A1-8) or immunolabelled for Glypican-5 core protein (B1-8). Dotted white lines demarcate outline of the lens capsule. For immunofluorescence, nuclei were counterstained with Hoechst dye (blue). Abbreviations: Lens; central anterior epithelium (epi) and capsule (ac), germinative zone (gz), transitional zone (tz), lens fibre cells (fib), posterior lens capsule (pc), blood vessel (bv). Cornea; epithelium (epi), Bowman's capsule (bc), stroma (str), endothelium (endo), Descemet's membrane (dm). Ciliary body; non-pigmented ciliary epithelium (nce), pigmented ciliary epithelium (pce). Scale bars = 25  $\mu$ m.
